# Supplementary material for: Factors Associated with Glycemic Variability in Patients with Type 2 Diabetes: Focus on Oral Hypoglycemic Agents and Cardiovascular Risk Factors
Source: PubMed Central journal article supplement — Endocrinol Metab (Seoul). 2015 Aug 4;30(3):352–60. doi: 10.3803/EnM.2015.30.3.352 (PMC4595361; doi:10.3803/enm.2015.30.3.352), 2015-08-04
Supplement: enm-30-352-s001.pdf [file enm-30-352-s001.pdf]

**Supplemental Table S1.** Clinical Characteristics of Four Groups according to Oral Hypoglycemic Agent Usage

| Characteristic                     | Group 1    | Group 2    | Group 3    | Group 4    |
|------------------------------------|------------|------------|------------|------------|
| Use of AGI or DPP4i                | Yes        | No         | Yes        | No         |
| Use of SU                          | No         | No         | Yes        | Yes        |
| Number                             | 27 (11.4)  | 59 (25.0)  | 12 (5.1)   | 111 (47.0) |
| Age, yr                            | 61.48±1.2  | 56.12±1.33 | 60.75±2.68 | 58.5±0.76  |
| Male sex                           | 16 (59.3)  | 39 (66.1)  | 6 (50.0)   | 146 (69.9) |
| Duration of diabetes, yr           | 7.75±0.96  | 3.66±0.66  | 10.31±1.64 | 9.67±0.66  |
| Body mass index, kg/m <sup>2</sup> | 25.24±0.61 | 25.97±0.37 | 25.83±1.34 | 26.37±0.31 |
| HbA1c, %                           | 6.81±0.13  | 6.8±0.12   | 7.2±0.19   | 7.18±0.08  |
| Use of MET or TZD                  | 27 (100)   | 43 (73)    | 9 (75)     | 109 (98)   |

Values are expressed as number (%) or mean ± standard error.

AGI,  $\alpha$ -glucosidase inhibitor; DPP4i, dipeptidyl peptidase-4 inhibitor; SU, sulfonylurea; HbA1c, glycated hemoglobin; MET, metformin; TZD, thiazolidinedione.
